# Supplementary material for: Genome-wide matching of genes to cellular roles using guilt-by-association models derived from single sample analysis
Source: PubMed Central journal article supplement (PMC3599284; doi:10.1186/1756-0500-5-370), 2012-07-23
Supplement: 1756-0500-5-370-S1.pdf [file 1756-0500-5-370-S1.pdf]

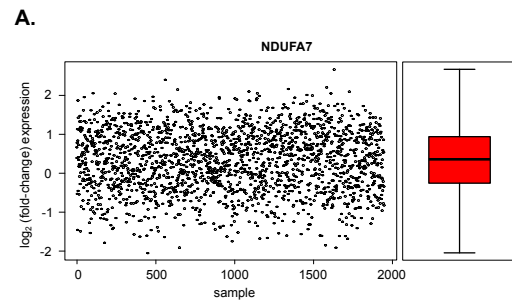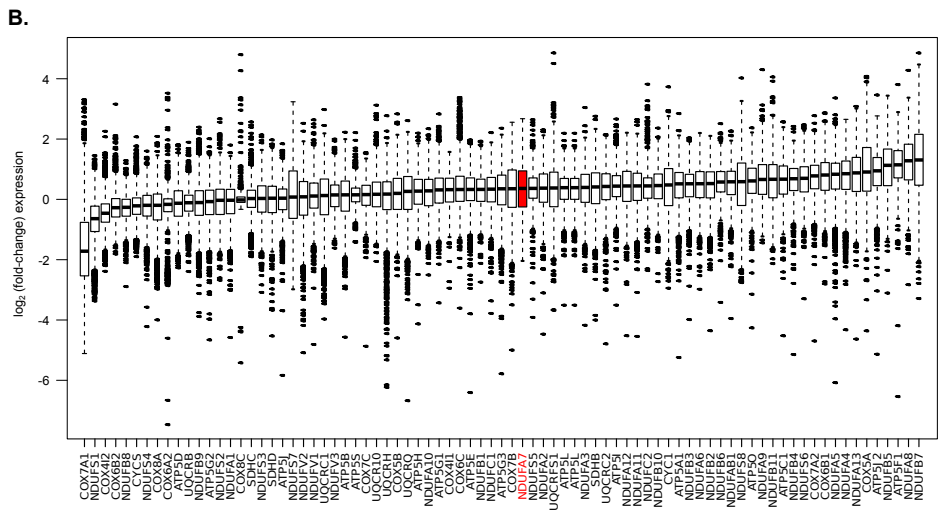

**Supplemental Figure 1**

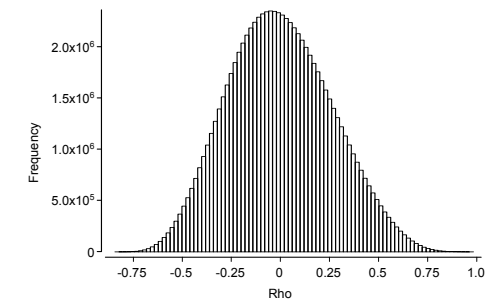

**Supplemental Figure 2**

| Gene     | Rho  | Gene    | Rho  | Gene   | Rho   |
|----------|------|---------|------|--------|-------|
| COX7B    | 0.87 | NDUFV2  | 0.75 | NDUFB3 | 0.63  |
| NDUFA13  | 0.86 | NDUFB10 | 0.75 | ATP5E  | 0.62  |
| NDUF53   | 0.85 | NDUFA6  | 0.75 | ATP5I  | 0.62  |
| COX5B    | 0.85 | NDUFA11 | 0.75 | UQCRH  | 0.61  |
| UQCRC1   | 0.85 | NDUF57  | 0.75 | NDUFV3 | 0.60  |
| ATP5B    | 0.84 | COX5A   | 0.74 | SDHD   | 0.60  |
| ATP5G3   | 0.83 | NDUFV1  | 0.74 | NDUFB1 | 0.60  |
| UQCRCFS1 | 0.83 | NDUFA12 | 0.74 | CYCS   | 0.59  |
| NDUF58   | 0.83 | CYC1    | 0.73 | NDUF51 | 0.57  |
| COX6B1   | 0.83 | NDUFA9  | 0.72 | SDHC   | 0.56  |
| NDUF7    | 0.82 | ATP5J   | 0.71 | UQCRB  | 0.56  |
| NDUFA7   | 0.82 | COX7C   | 0.71 | NDUFB9 | 0.56  |
| NDUFA8   | 0.81 | ATP5F1  | 0.70 | NDUFA5 | 0.54  |
| UQCRQ    | 0.81 | NDUFA4  | 0.70 | NDUF2  | 0.53  |
| NDUFB11  | 0.81 | NDUF56  | 0.70 | ATP5G2 | 0.53  |
| SDHB     | 0.80 | ATP5A1  | 0.69 | NDUF55 | 0.53  |
| NDUF5    | 0.80 | ATP5D   | 0.68 | NDUF52 | 0.51  |
| NDUFA1   | 0.79 | NDUFA10 | 0.68 | ATP5G1 | 0.50  |
| ATP5C1   | 0.79 | COX7A2  | 0.68 | COX6C  | 0.45  |
| ATP5J2   | 0.78 | UQCRC2  | 0.68 | ATP5S  | 0.43  |
| ATP5H    | 0.77 | UQCR10  | 0.68 | NDUF4  | 0.34  |
| NDUFA2   | 0.77 | ATP5L   | 0.66 | COX6A2 | 0.20  |
| ATP5O    | 0.77 | COX4I1  | 0.66 | COX7A1 | -0.09 |
| COX8A    | 0.77 | NDUFC1  | 0.66 | COX9C  | -0.09 |
| NDUFAB1  | 0.77 | NDUFB2  | 0.65 | COX4I2 | -0.37 |
| NDUFA3   | 0.76 | NDUFB6  | 0.65 | COX6B2 | -0.44 |
| NDUF4    | 0.75 | NDUF8   | 0.63 |        |       |

**Supplemental Figure 3**

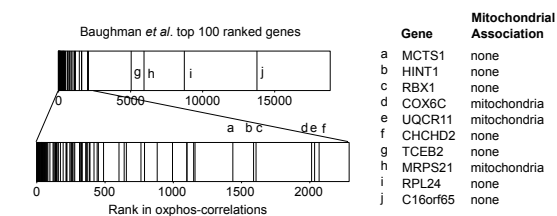

**Supplemental Figure 4**

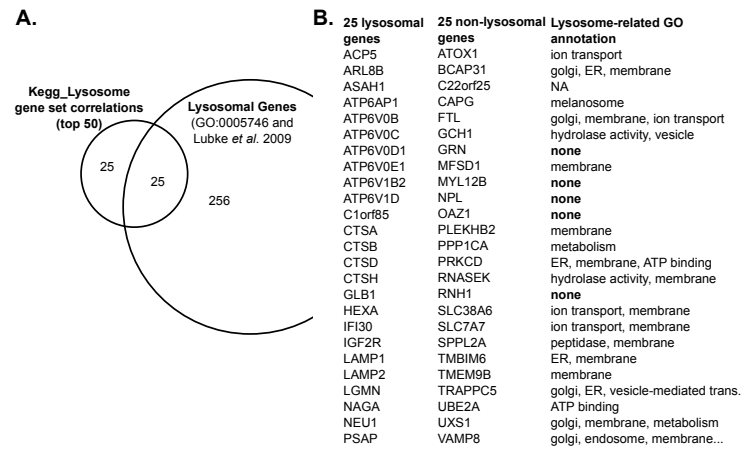

**Supplemental Figure 5**
